# Supplementary material for: A New Lignan Glucoside from the Whole Plants of Salvia Scapiformis
Source: Molecules. 2013 Sep 13;18(9):11377–83. doi: 10.3390/molecules180911377 (PMC6269659; doi:10.3390/molecules180911377)

## Supplementary Materials

**Figure S1.** HRESIMS spectrum of compound **1**.

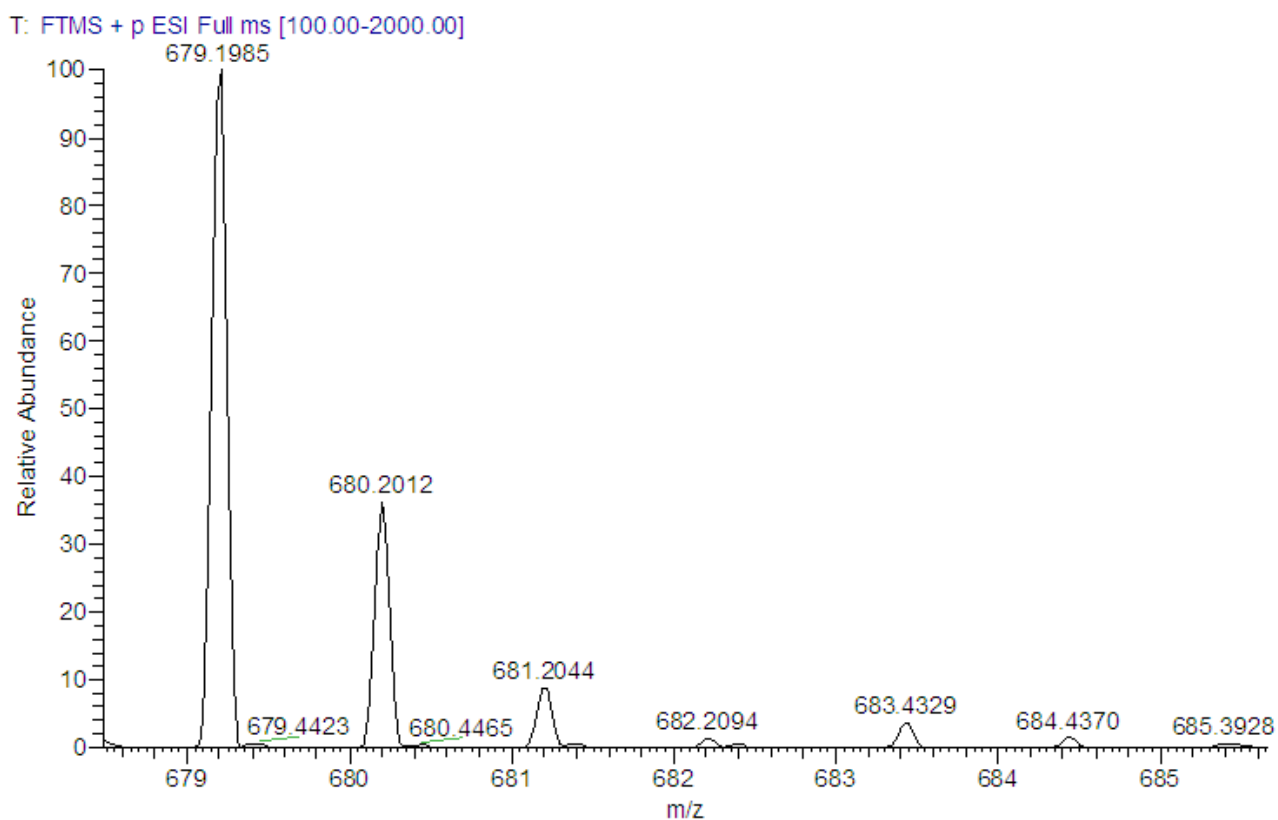

**Figure S2.** IR spectrum of compound **1**.

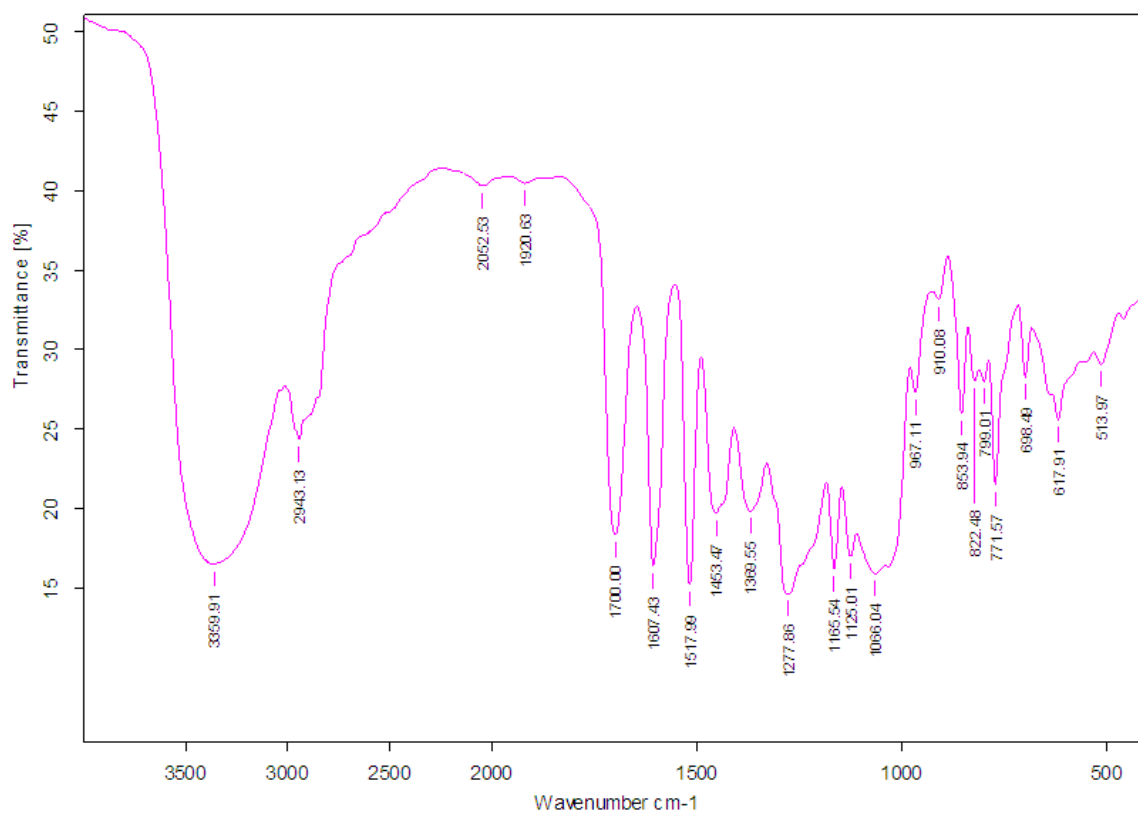

Figure S3. UV spectrum of compound 1.

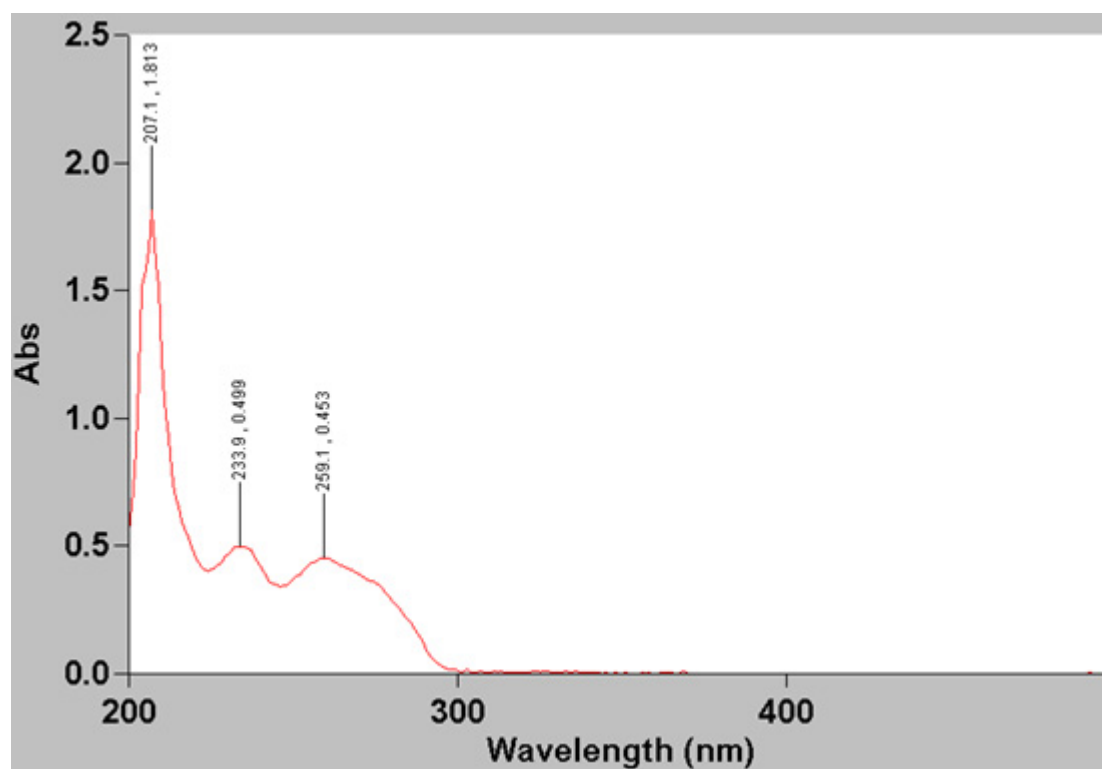Figure S4.  $^1\text{H}$ -NMR spectrum of compound 1.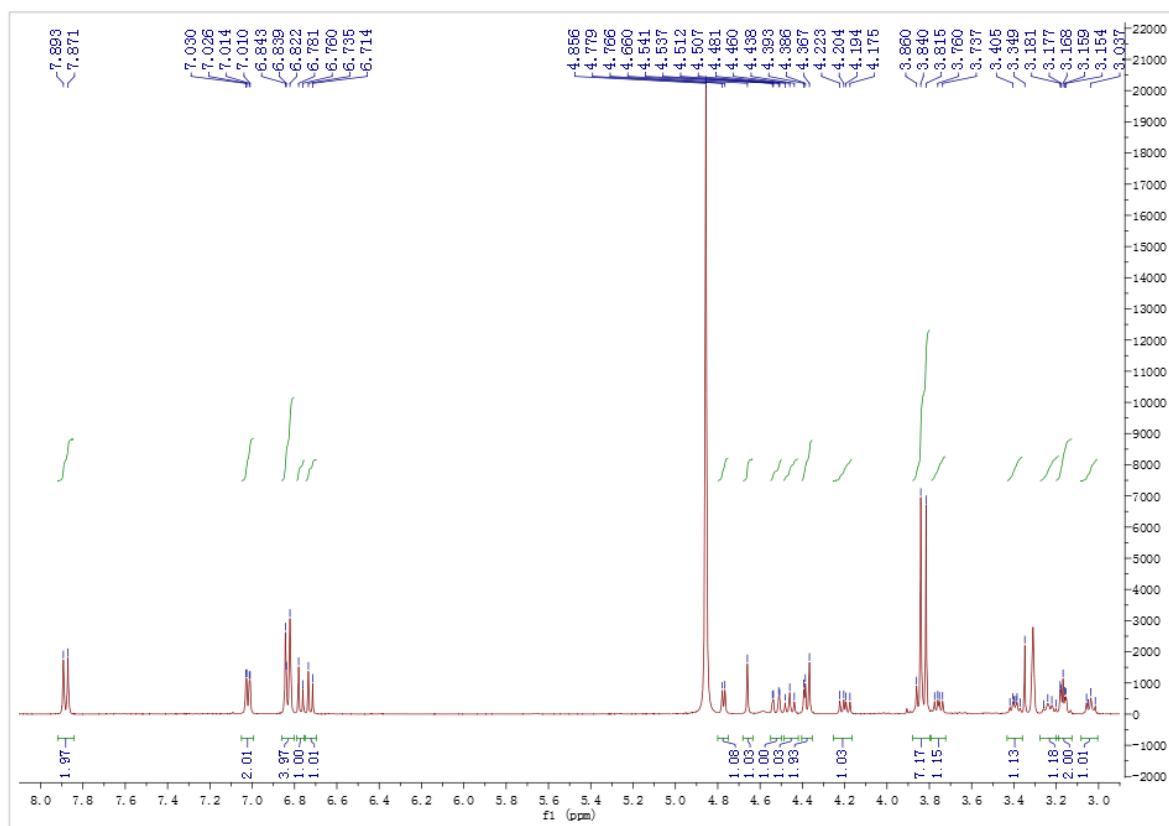

**Figure S5.**  $^{13}\text{C}$ -NMR and DEPT spectra of compound **1**.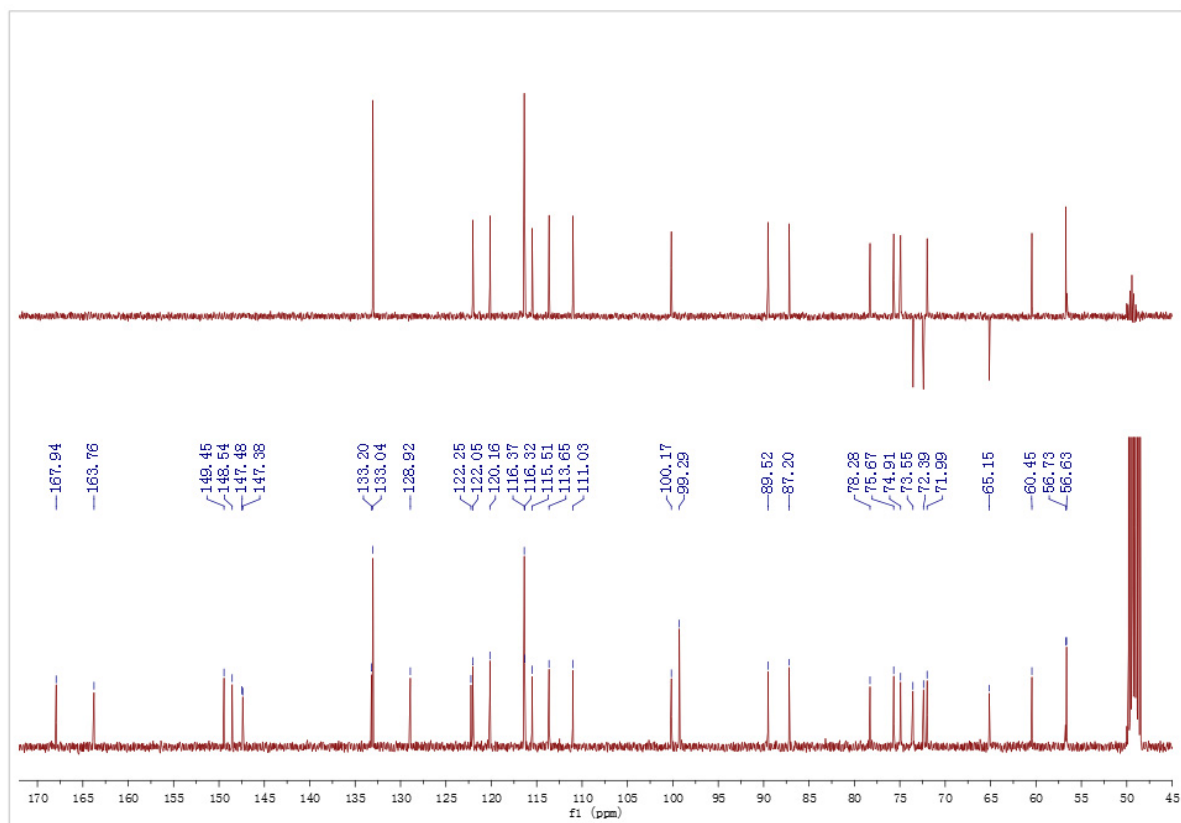**Figure S6.** HSQC spectrum of compound **1**.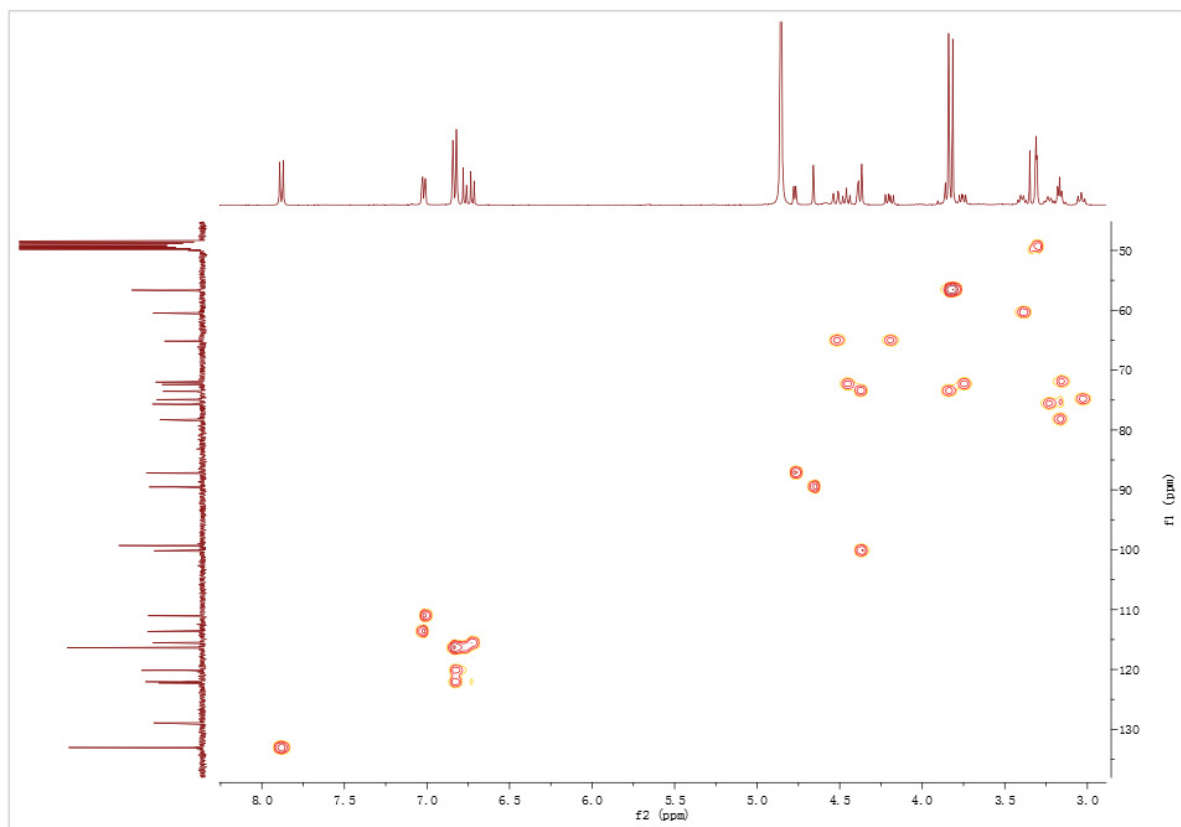

**Figure S7.** COSY spectrum of compound **1**.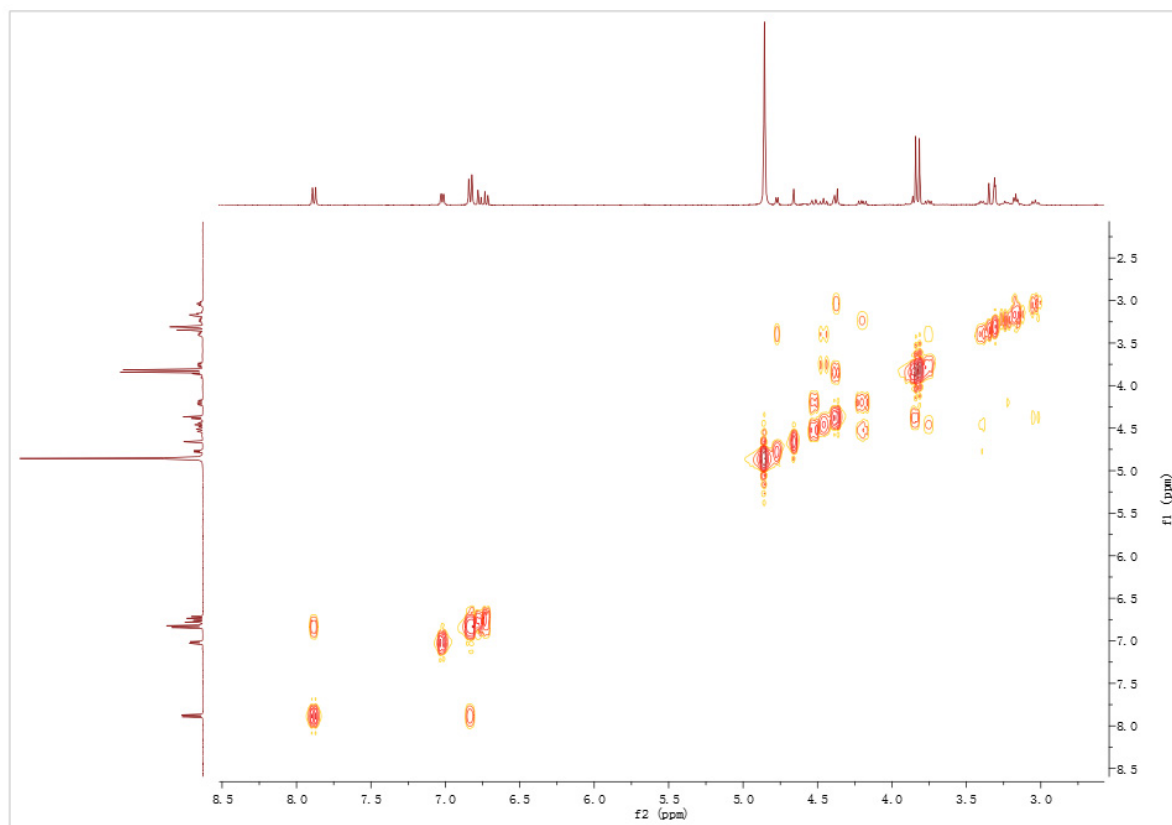**Figure S8.** HMBC spectrum of compound **1**.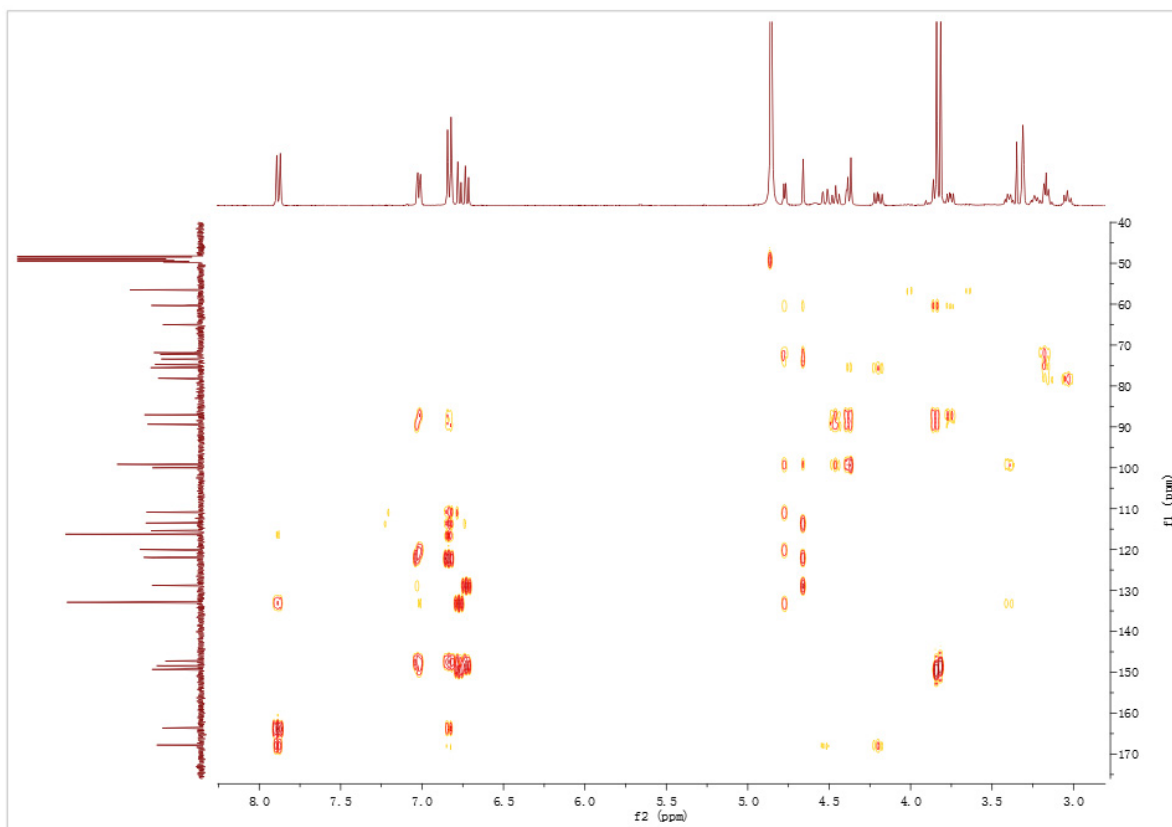

**Figure S9.** NOSEY spectrum of compound 1.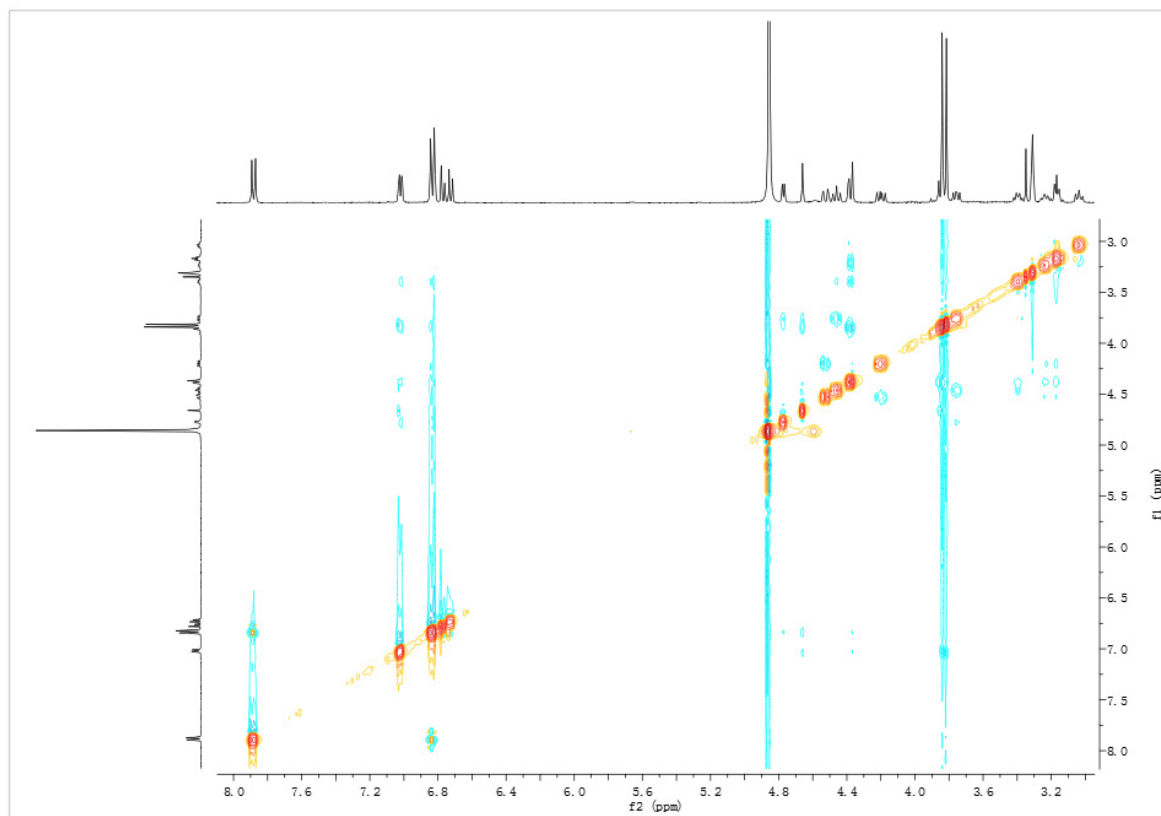**Figure S10.** GS analysis of the sugar of compound 1 (A: L-glucose; B: D-Glucose; C: sugar of compound 1).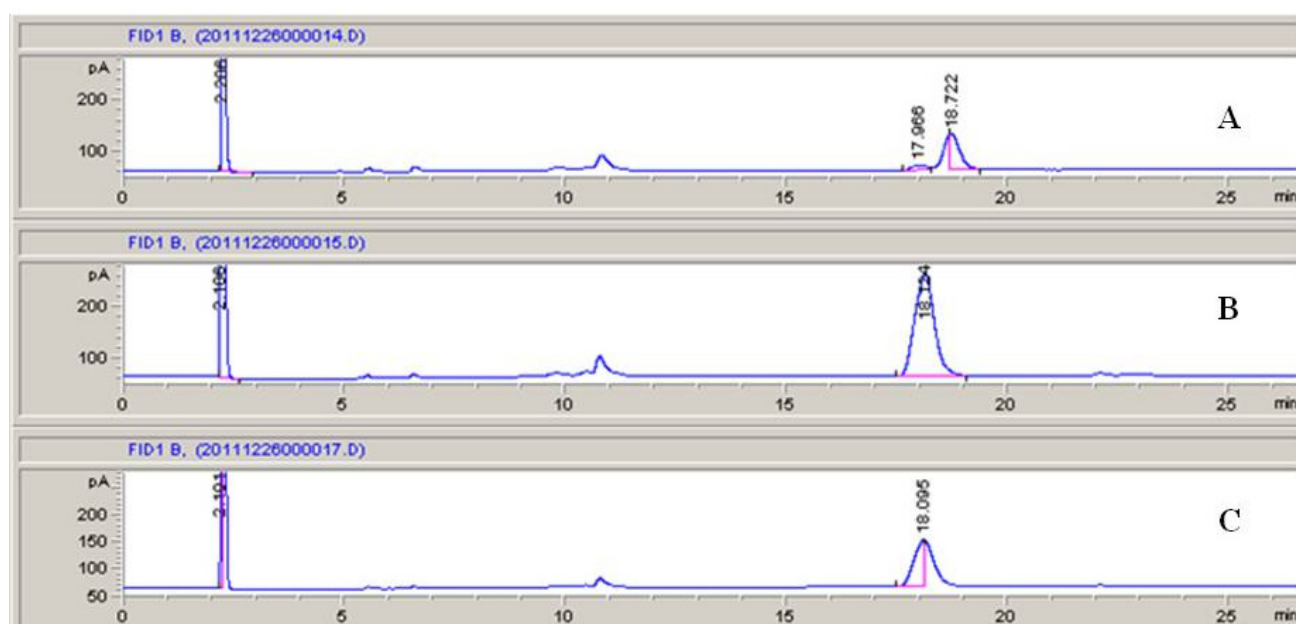

Supplement: Supplementary file 1 [file molecules-18-11377-s001.pdf]
